# Supplementary material for: Information Discovery on Electronic Health Records Using Authority Flow Techniques
Source: Springer Nature journal article supplement (doi:10.1186/1472-6947-10-64), 2010-10-22

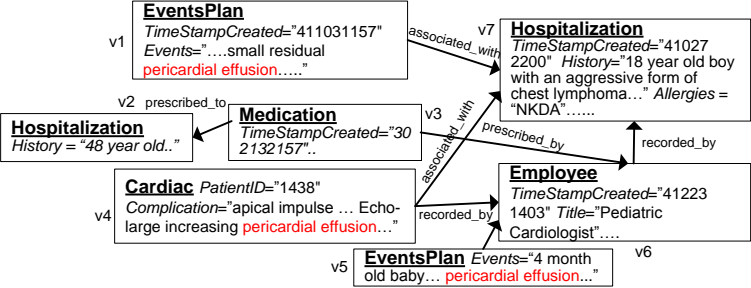

Supplement: 12911_2010_365_MOESM3_ESM.pdf [file 12911_2010_365_MOESM3_ESM.pdf]
